# Supplementary material for: Foster Care, Externalizing Disorders, and Antipsychotic Use Among Medicaid-Enrolled Youths
Source: Atypon-hosted journal article supplement (doi:10.1176/appi.ps.201300455), 2014-10-01
Supplement: 1281_ds001.pdf [file 1281_ds001.pdf]

**Clinical and Demographic Characteristics of Medicaid Beneficiaries Ages 0 to 18 by Enrollment in Foster Care (%)**

|                                          | <b>TANF/SCHIP/SSI</b> | <b>Foster</b>    |
|------------------------------------------|-----------------------|------------------|
|                                          | <b>n=5,092,574</b>    | <b>n=301,894</b> |
| <b>Age</b>                               |                       |                  |
| 0-5                                      | 35.5                  | 18.1             |
| 6-9                                      | 22.6                  | 22.7             |
| 10-13                                    | 19.7                  | 25.6             |
| 14-18                                    | 22.1                  | 33.6             |
| <b>Gender</b>                            |                       |                  |
| Male                                     | 50.9                  | 51.6             |
| Female                                   | 49.1                  | 48.4             |
| <b>Race/Ethnicity</b>                    |                       |                  |
| White                                    | 41.7                  | 46.8             |
| Black                                    | 29.1                  | 36.8             |
| Hispanic                                 | 24.1                  | 12.9             |
| Other                                    | 5.1                   | 3.5              |
| <b>Psychiatric Diagnoses</b>             |                       |                  |
| Attention Deficit Hyperactivity Disorder | 6.5                   | 17.3             |
| Disruptive Behavior Disorder             | 2.5                   | 7.2              |
| Conduct Disorder                         | .5                    | 2.3              |
| Stress-Related Disorders                 | .5                    | 3.1              |
| Substance Use Disorder                   | .6                    | 1.6              |
| Other Mental Health Diagnosis            | 7.8                   | 12.8             |
| <b>Comorbidity</b>                       |                       |                  |
| No diagnosis                             | 83.5                  | 62.9             |
| One diagnosis                            | 15.0                  | 31.1             |
| Two or more diagnoses                    | 1.6                   | 6.0              |
| <b>Any Antipsychotic Use</b>             | 1.4                   | 7.4              |

**Rates of Antipsychotic Use by Clinical/Demographic Characteristics,  
Stratified by Enrollment in Foster Care (%)**

|                                          | <b>TANF/SCHIP/SSI</b> | <b>Foster</b>    |
|------------------------------------------|-----------------------|------------------|
|                                          | <b>n=5,092,574</b>    | <b>n=301,894</b> |
| <b>Age</b>                               |                       |                  |
| 0-5                                      | .2                    | 1.3              |
| 6-9                                      | 1.6                   | 7.0              |
| 10-13                                    | 2.4                   | 9.4              |
| 14-18                                    | 2.4                   | 9.5              |
| <b>Gender</b>                            |                       |                  |
| Male                                     | 2.1                   | 9.6              |
| Female                                   | .8                    | 5.1              |
| <b>Race/Ethnicity</b>                    |                       |                  |
| White                                    | 2.1                   | 8.9              |
| Black                                    | 1.2                   | 6.7              |
| Hispanic                                 | .6                    | 4.8              |
| Other                                    | .8                    | 5.3              |
| <b>Psychiatric Diagnoses</b>             |                       |                  |
| Attention Deficit Hyperactivity Disorder | 14.1                  | 25.5             |
| Disruptive Behavior Disorder             | 16.1                  | 28.2             |
| Conduct Disorder                         | 25.5                  | 37.6             |
| Stress-Related Disorders                 | 13.3                  | 31.5             |
| Substance Use Disorder                   | 7.1                   | 18.7             |
| Other Mental Health Diagnosis            | 2.6                   | 6.5              |
| <b>Comorbidity</b>                       |                       |                  |
| No diagnosis                             | .2                    | 1.5              |
| One diagnosis                            | 6.1                   | 13.4             |
| Two or more diagnoses                    | 30.1                  | 43.8             |

### Psychiatric Diagnoses and Corresponding ICD-9-CM Codes

| <b>Diagnosis</b>                                                                       | <b>ICD-9-CM Code</b>              |
|----------------------------------------------------------------------------------------|-----------------------------------|
| Schizophrenia                                                                          | 295                               |
| Bipolar Disorder                                                                       | 296.0, 296.1, 296.4-296.8, 301.13 |
| Autism                                                                                 | 299.0                             |
| Major Depressive Disorder                                                              | 296.2, 296.3                      |
| Attention Deficit Hyperactivity Disorder                                               | 314                               |
| Disruptive Behavior Disorder (includes Oppositional Defiant Disorder)                  | 312.9, 313.81                     |
| Conduct Disorder                                                                       | 312.0-312.89                      |
| Adaptive Disorders (includes Acute Stress Disorder and Post Traumatic Stress Disorder) | 308.3, 309.81                     |
| Substance Use Disorders                                                                | 291, 292, 303, 304, 305           |
